# Supplementary material for: Effective adsorption of phenolic pollutants from water using β-cyclodextrin polymer functionalized Fe3O4 magnetic nanoparticles
Source: Royal Society of Chemistry journal article supplement (doi:10.1039/c6ra16383a), 2016-01-01
Supplement: c6ra16383a1.pdf [file c6ra16383a1.pdf]

## *Electronic Supplementary Information*

### **Effective Adsorption of Phenolic Pollutants from Water using $\beta$ -cyclodextrin Polymer Assembled $\text{Fe}_3\text{O}_4$ magnetic Nanocomposites**

Tao Gong<sup>a</sup>, Yehong Zhou<sup>a</sup>, Linlin Sun<sup>a</sup>, Wenting Liang<sup>a\*</sup>, Jun Yang<sup>b</sup>, Shaomin Shuang<sup>a</sup>, Chuan Dong<sup>a\*</sup>

<sup>a</sup> *Institute of Environmental Sciences, Department of Chemistry, Shanxi University, Taiyuan 030006, China. E-mail: liangwt@sxu.edu.cn; dc@sxu.edu.cn.*

<sup>b</sup> *Department of Mechanical and Materials Engineering, University of Western Ontario, London, Ontario N6G 0J3, Canada*

### **Table of Contents**

**Text S1. Determination of CD content of the polymer**

**Text S2. Determination of binding constant by fluorescence titration measurements**

**Table S1. Concentration of Iron ions release from CDP-MNPs**

**Table S2. Values of pH effects on the adsorption of bisphenol A or resorcin onto CDP-MNPs**

**Table S3. Adsorption kinetic values of CDP-MNPs towards bisphenol A and resorcin**

**Table S4. Binding constant ( $K_c$ ) between phenolic pollutants and CM-CD**

**Fig.S1. Plot of calibration curves for glucose solution with different concentration.**

**Fig.S2. Differential scanning calorimetry of cyclodextrin polymers.**

**Fig.S3. TEM images of naked MNPs.**

**Fig.S4. Differential scanning calorimetry of CDP-MNPs.**

**Fig.S5. Plot of calibration curves for resorcin and bisphenol A solution with different concentration.**

**Fig.S6. The linear fitting plots of Lagergren's pseudo-first-order and Ho's pseudo-second-order equations.**

**Fig.S7. The plot of Weber's intraparticle diffusion model.**

**Fig.S8. Langmuir plot and Freundlich plot for adsorption of resorcin.**

**Fig.S9. Langmuir plot and Freundlich plot for adsorption of bisphenol A.**

**Fig.S10. Plot of binding constant for phenolic pollutants and CM-CD**

### **Text S1. Determination of CD content of the polymer**

According to the Prior to calculate the CD content, a calibration curve was prepared. The solution containing various concentrations of anhydrous glucose was mixed with 1 ml 4% phenol standard solution and 7 ml concentrated sulphuric acid. After shaken well, the mixing aqueous was thermostatically incubated in 50 °C water bath for 30min and then measured the absorbance of the mixing aqueous at room temperature by Perkin Elmer Lambda 365 spectrophotometer. The absorbance signals at 490 nm were plotted versus the concentration of anhydrous glucose to obtain the calibration curve.

CDP (10 mg) was mixed with 10ml 5mol/L H<sub>2</sub>SO<sub>4</sub> in test tubes, and the sample was kept for 4 h in 80 °C water bath to ensure complete acidolysis. After the determination of glucose level, the corresponding CD content was calculated as follows:

$$\text{CD content} = \frac{C \times V \times M}{180 \times n \times 0.01} \times 100\%$$

where  $C$  is the glucose concentration (g/L);  $V$  is the volume of mixed solution (L);  $M$  is the molar mass of CD (g/mol); and  $n$  is the number of glucose in CD unit.

## **Text S2. Determination of binding constant by fluorescence titration measurements**

The binding constants of phenolic pollutants with carboxymethyl- $\beta$ -cyclodextrin(CM-CD) have been determined by Bensei-Hildebrand method. The fluorescence signal changes of resorcin and bisphenol A solutions have been observed by adding small amount of CM-CD gradually. Following the Bensei-Hildebrand method, the  $1/\Delta I$  were plotted versus the  $1/[\text{CM-CD}]$  to obtain the straight line which indicated the 1:1 host-guest complex formed. The binding constant ( $K_c$ ) was obtained by calculation the ratio between intercept and slope of the line.

**Table S1** Concentration of Iron ions release from CDP-MNPs under different pH at 25 °C .

| Time/h               | C <sub>i</sub> at pH 5 (µg/L) <sup>a</sup> | C <sub>i</sub> at pH 7 (µg/L) |
|----------------------|--------------------------------------------|-------------------------------|
| 6                    | 30.42                                      | 26.65                         |
| 12                   | 25.44                                      | 21.32                         |
| 24                   | 26.83                                      | 17.93                         |
| 48                   | 24.32                                      | 18.56                         |
| Control <sup>b</sup> | 0.00                                       | 0.00                          |

<sup>a</sup> the water solution is adjusted to pH 5 with HNO<sub>3</sub>. <sup>b</sup> the water solution without CDP-MNPs.

**Table S2** Values of pH effects on the adsorption of bisphenol A or resorcin onto CDP-MNPs.

| pH | Bisphenol A               |                           |                           |                |      | Resorcin                  |                           |                           |                |      |
|----|---------------------------|---------------------------|---------------------------|----------------|------|---------------------------|---------------------------|---------------------------|----------------|------|
|    | Q <sub>e1</sub><br>(mg/g) | Q <sub>e2</sub><br>(mg/g) | Q <sub>e3</sub><br>(mg/g) | Mean<br>(mg/g) | SD/% | Q <sub>e1</sub><br>(mg/g) | Q <sub>e2</sub><br>(mg/g) | Q <sub>e3</sub><br>(mg/g) | Mean<br>(mg/g) | SD/% |
| 3  | 48.77                     | 48.79                     | 48.79                     | 48.78          | 1.41 | 66.45                     | 66.49                     | 66.50                     | 66.48          | 2.76 |
| 4  | 58.55                     | 58.51                     | 58.46                     | 58.51          | 3.04 | 75.68                     | 75.64                     | 75.68                     | 75.67          | 2.68 |
| 5  | 62.23                     | 62.25                     | 62.23                     | 62.24          | 1.97 | 81.15                     | 81.18                     | 81.19                     | 81.17          | 2.61 |
| 6  | 59.17                     | 59.18                     | 59.16                     | 59.17          | 1.34 | 72.04                     | 72.09                     | 72.06                     | 72.06          | 3.25 |
| 7  | 51.70                     | 51.76                     | 51.76                     | 51.74          | 3.95 | 67.85                     | 67.89                     | 67.86                     | 67.87          | 2.68 |
| 8  | 37.30                     | 37.35                     | 37.51                     | 37.39          | 3.39 | 59.63                     | 59.67                     | 59.69                     | 59.67          | 2.96 |
| 9  | 27.74                     | 27.71                     | 27.71                     | 27.72          | 1.97 | 48.89                     | 48.93                     | 48.94                     | 48.92          | 3.04 |

**Table S3** Adsorption kinetic values of CDP-MNPs towards bisphenol A and resorcin under pH 5.0 at 25 °C

| Bisphenol A               |                           |                           |                |      | Resorcin                  |                           |                           |                |      |
|---------------------------|---------------------------|---------------------------|----------------|------|---------------------------|---------------------------|---------------------------|----------------|------|
| Q <sub>e1</sub><br>(mg/g) | Q <sub>e2</sub><br>(mg/g) | Q <sub>e3</sub><br>(mg/g) | Mean<br>(mg/g) | SD/% | Q <sub>e1</sub><br>(mg/g) | Q <sub>e2</sub><br>(mg/g) | Q <sub>e3</sub><br>(mg/g) | Mean<br>(mg/g) | SD/% |
| 6.38                      | 6.43                      | 6.38                      | 6.40           | 3.25 | 9.52                      | 9.56                      | 9.55                      | 9.54           | 2.54 |
| 17.67                     | 17.64                     | 17.69                     | 17.67          | 2.33 | 26.10                     | 26.12                     | 26.118                    | 26.11          | 1.62 |
| 29.55                     | 29.58                     | 29.82                     | 29.65          | 1.69 | 43.35                     | 43.31                     | 43.25                     | 43.31          | 2.60 |
| 41.34                     | 41.32                     | 41.32                     | 41.32          | 1.48 | 61.81                     | 61.78                     | 61.803                    | 61.80          | 2.47 |
| 49.39                     | 49.42                     | 49.42                     | 49.41          | 2.19 | 73.22                     | 73.20                     | 73.182                    | 73.20          | 1.97 |
| 53.54                     | 53.50                     | 53.57                     | 53.54          | 3.04 | 78.72                     | 78.68                     | 78.693                    | 78.70          | 3.35 |
| 56.92                     | 56.98                     | 56.96                     | 56.95          | 4.13 | 79.10                     | 79.13                     | 79.102                    | 79.11          | 1.97 |
| 58.03                     | 57.98                     | 58.05                     | 58.02          | 3.46 | 79.31                     | 79.35                     | 79.316                    | 79.37          | 2.68 |
| 58.66                     | 58.69                     | 58.72                     | 58.69          | 2.19 | 79.29                     | 79.26                     | 79.323                    | 79.29          | 1.97 |

**Table S4. Binding constants ( $K_c$ ) of phenolic pollutants with carboxymethyl- $\beta$ -cyclodextrin**

| Phenolic pollutants | $K_c$ ( $10^4$ L/mol) |
|---------------------|-----------------------|
| Resorcin            | 0.6                   |
| Bisphenol A         | 0.7                   |

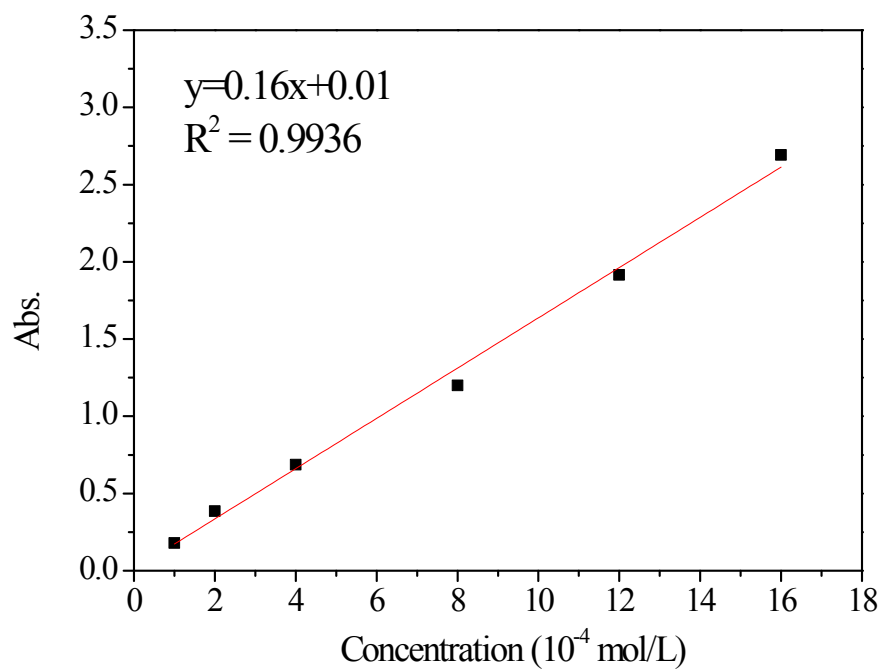

**Figure S1.** Plot of calibration curves for glucose solution with different concentration.



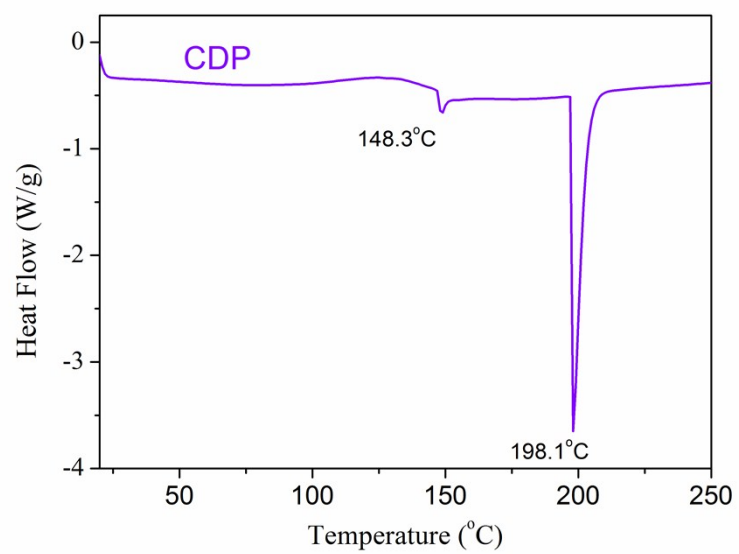

**Figure S2.** Differential scanning calorimetry of cyclodextrin polymers.

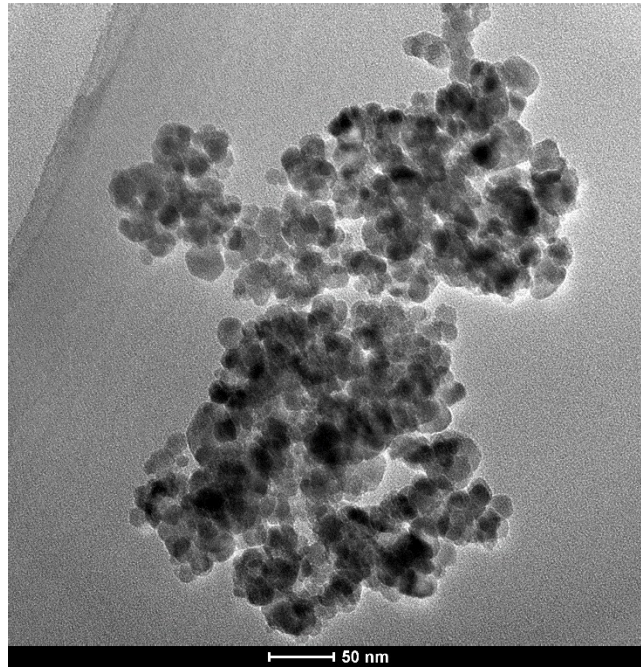

**Figure S3.** TEM images for naked MNPs.

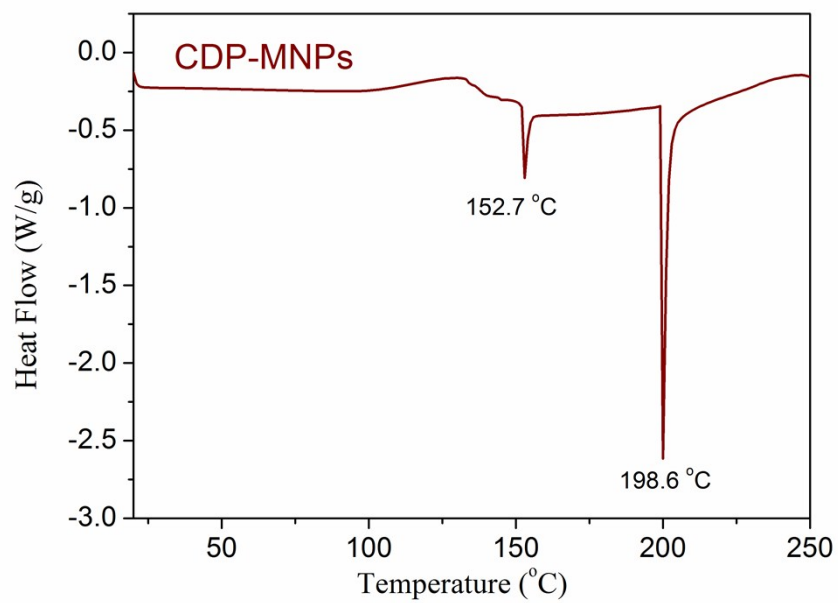

**Figure S4.** Differential scanning calorimetry of CDP-MNPs.

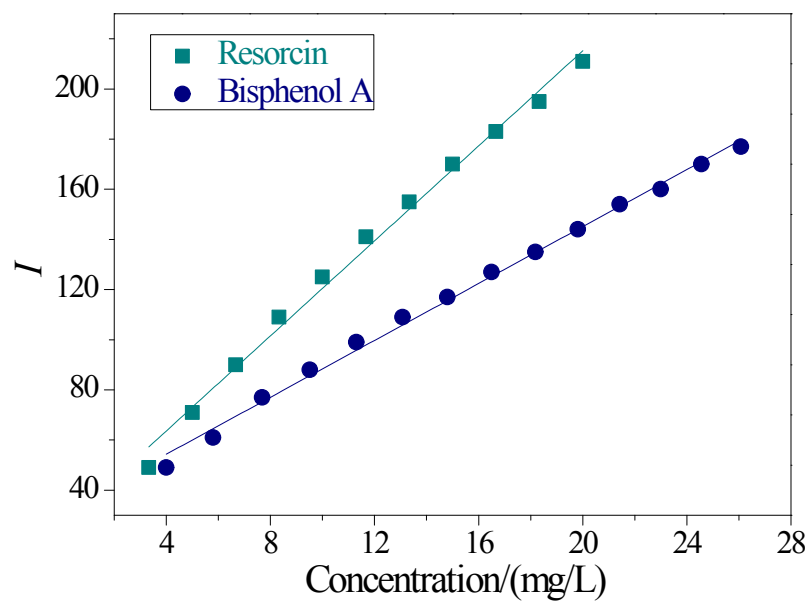

**Figure S5.** Plot of calibration curves for resorcin and bisphenol A solution with different concentration.

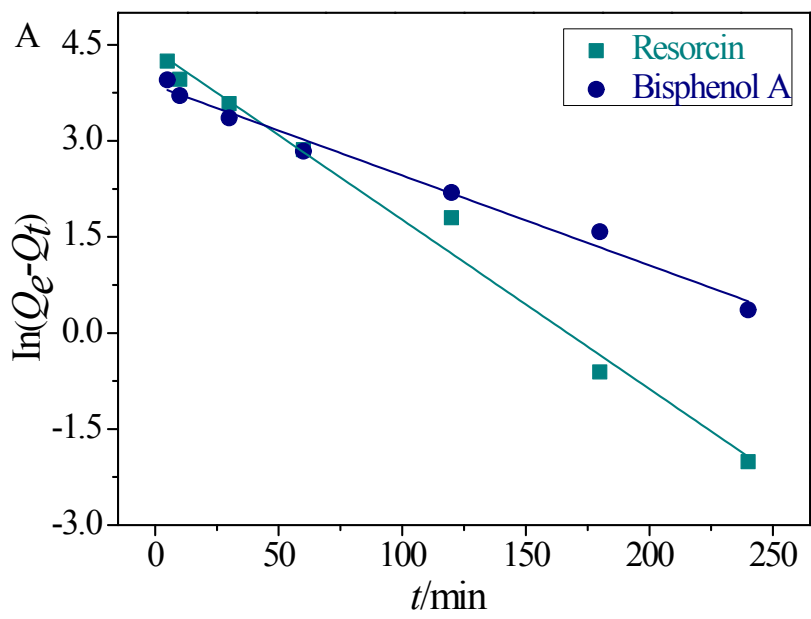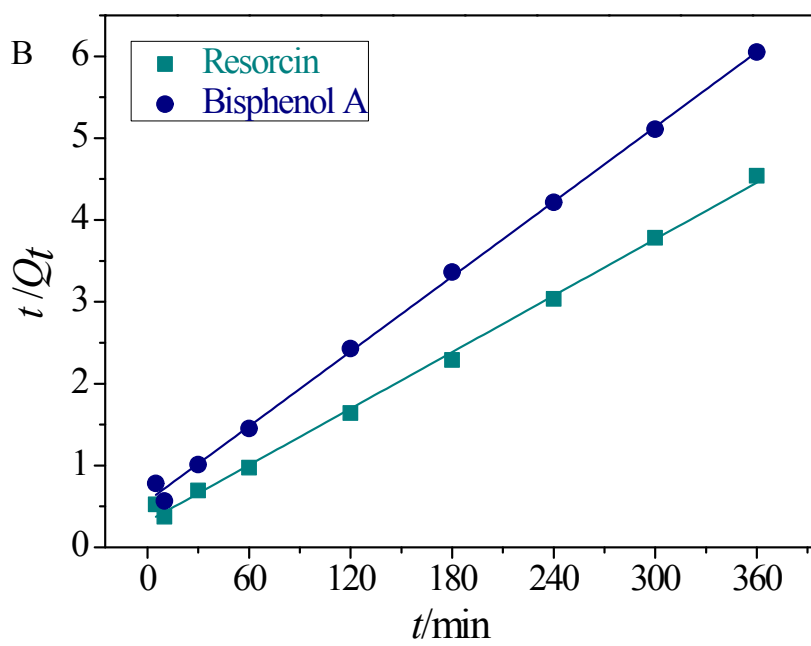

**Figure S6.** The linear fitting plots of Lagergren's pseudo-first-order (A) and Ho's pseudo-second-order (B) equations.

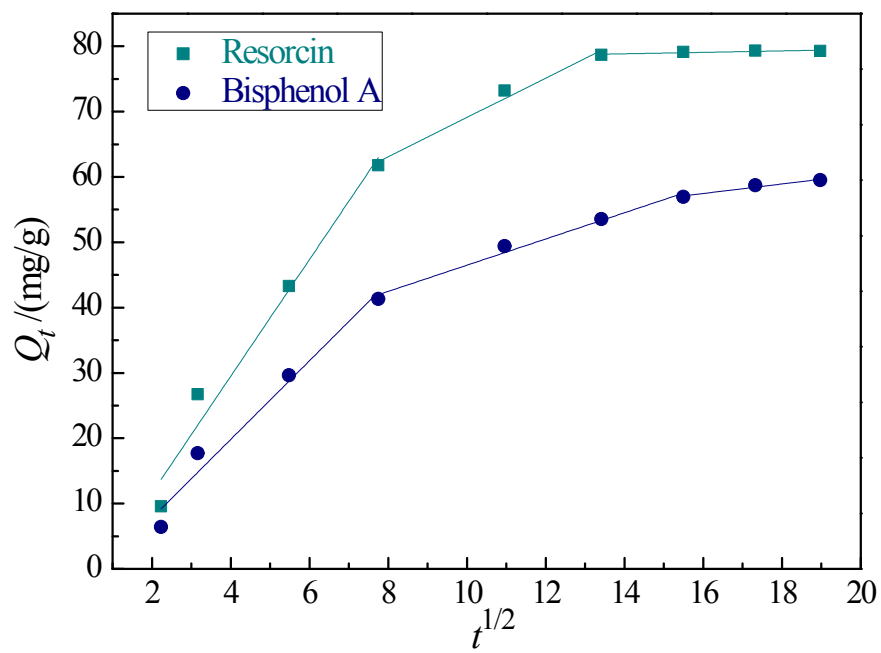

**Figure S7.** The plot of Weber's intraparticle diffusion model.

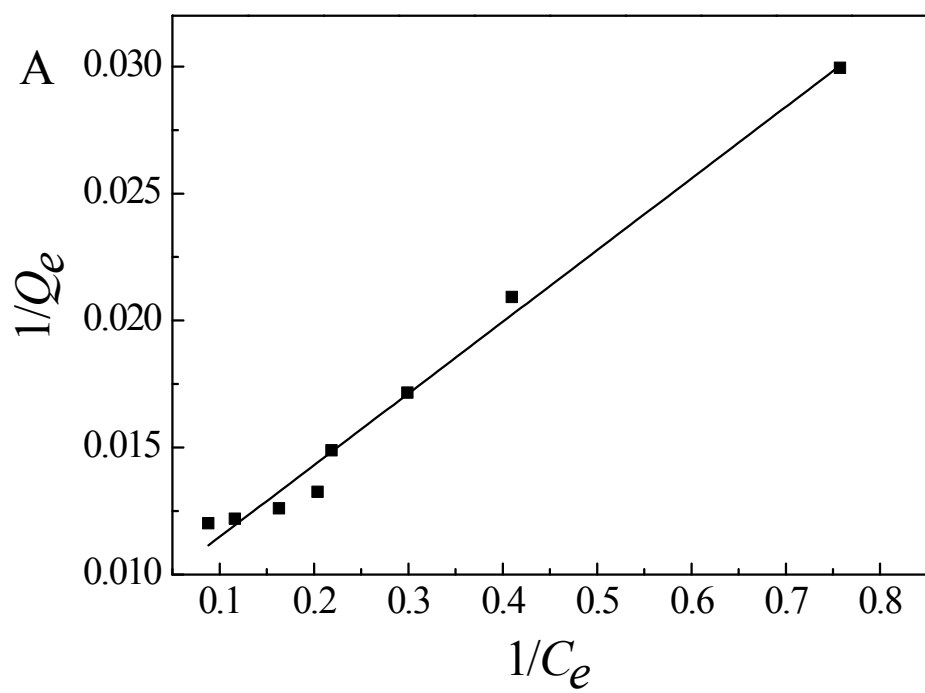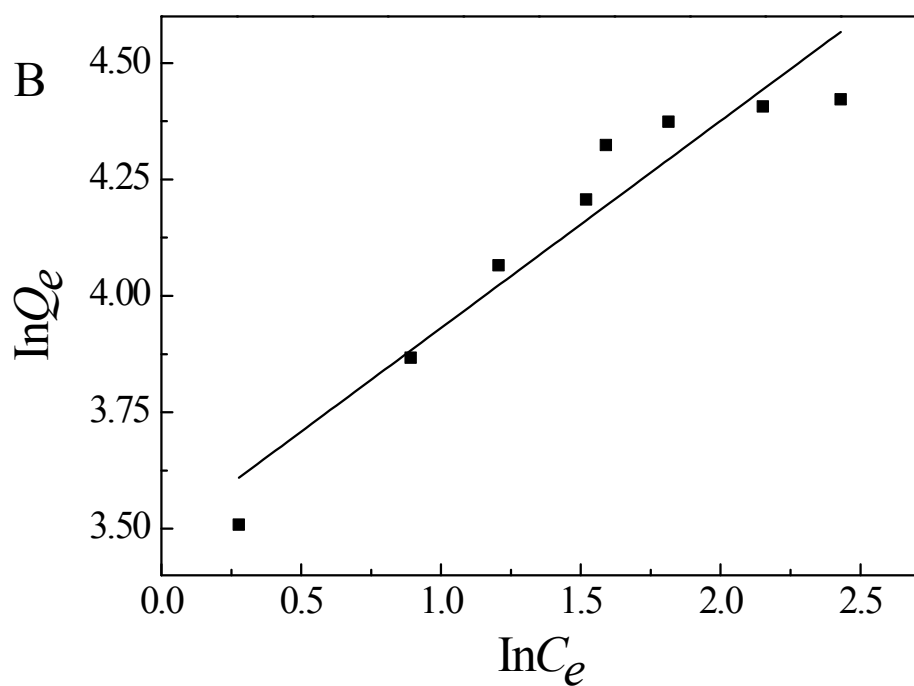

**Figure S8.** (A) Langmuir plot illustrating the linear dependences of  $1/Q_e$  on  $1/C_e$ , and (B) Freundlich plot illustrating the linear dependences of  $\ln Q_e$  on  $\ln C_e$  for adsorption of resorcin.

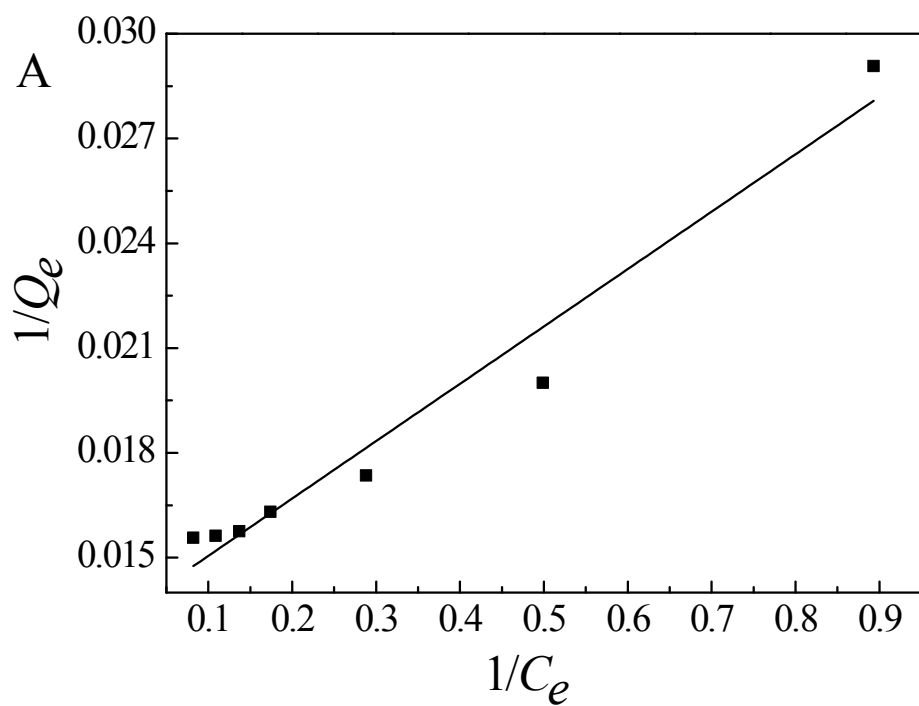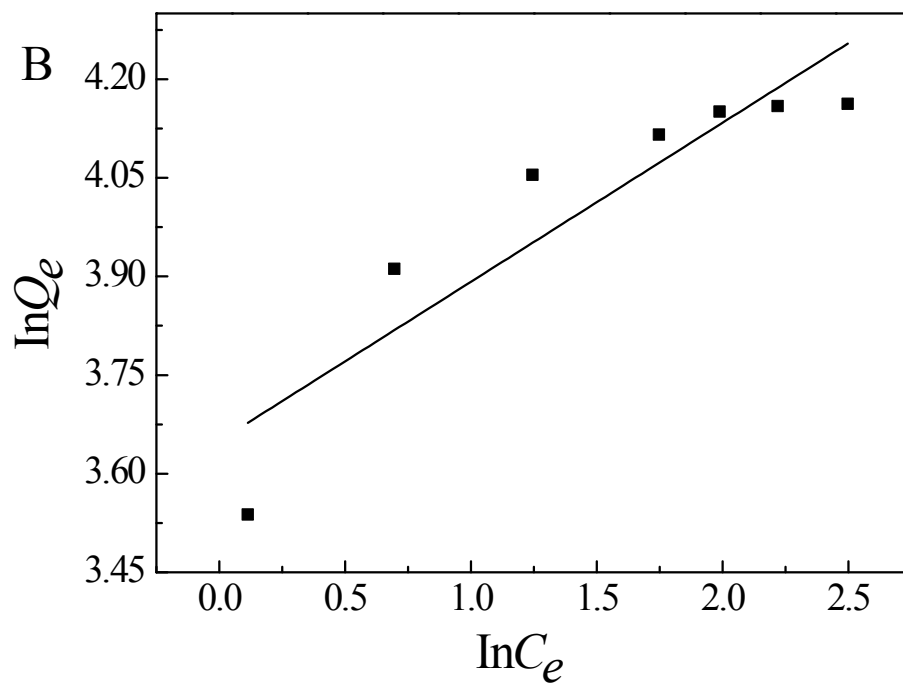

**Figure S9.** (A) Langmuir plot illustrating the linear dependences of  $1/Q_e$  on  $1/C_e$ , and (B) Freundlich plot illustrating the linear dependences of  $\ln Q_e$  on  $\ln C_e$  for adsorption of bisphenol A.



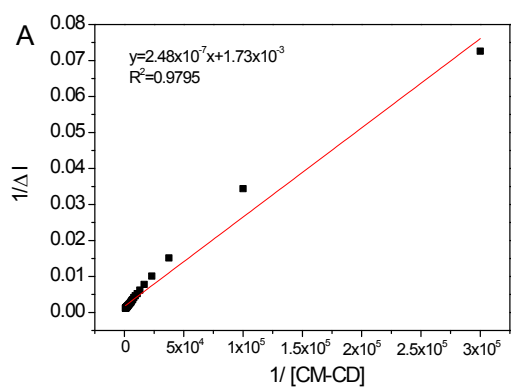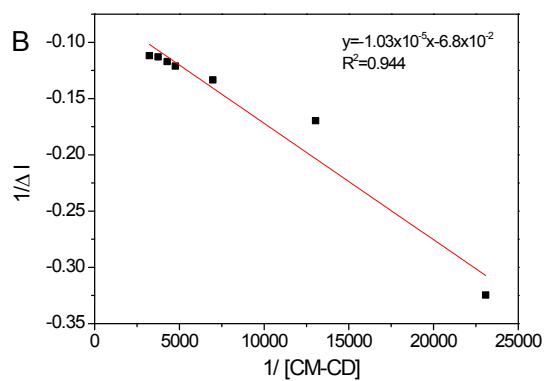

**Figure S10.** Plot of binding constant for bisphenol A (A) and resorcin (B) with carboxymethyl-β-cyclodextrin (CM-CD).
